# Supplementary material for: Immune Memory to Sudan Virus: Comparison between Two Separate Disease Outbreaks
Source: Viruses. 2015 Jan 6;7(1):37–51. doi: 10.3390/v7010037 (PMC4306827; doi:10.3390/v7010037)
Supplement: Supplementary File 1 [file viruses-07-00037-s001.pdf]

## Supplementary Materials

### Immune Memory to Sudan Virus: Comparison between Two Separate Disease Outbreaks

Ariel Sobarzo, Yael Eskira, Andrew S. Herbert, Ana I. Kuehne, Spencer W. Stonier, David E. Ochayon, Shlomit Fedida-Metula, Steven Balinandi, Yaara Kislev, Neta Tali, Eli C. Lewis, Julius Julian Lutwama, John M. Dye, Victoria Yavelsky and Leslie Lobel

**Table S1.** Subject profiles.

|     |                 | Gender | Age | Ebola Infection in 2012 | HIV |
|-----|-----------------|--------|-----|-------------------------|-----|
| S-1 | Kibaale, Uganda | F      | 36  | +                       | -   |
| S-2 |                 | F      | 35  | +                       | -   |
| S-3 |                 | F      | 30  | +                       | -   |
| S-4 |                 | F      | 61  | +                       | -   |
| S-5 |                 | F      | 29  | +                       | -   |
| N-1 | Kibaale, Uganda | F      | 30  | -                       | -   |
| N-2 |                 | F      | 36  | -                       | -   |
| N-3 |                 | M      | 42  | -                       | +   |
| N-4 |                 | F      | 37  | -                       | -   |
| N-5 |                 | M      | 27  | -                       | -   |
| S-1 | Gulu, Uganda    | F      | 58  | +                       | -   |
| S-2 |                 | F      | 44  | +                       | -   |
| S-3 |                 | F      | 20  | +                       | -   |
| S-4 |                 | F      | 32  | +                       | -   |
| S-5 |                 | F      | 56  | +                       | -   |
| S-6 | Gulu, Uganda    | M      | 42  | +                       | -   |
| N-1 |                 | M      | 25  | -                       | -   |
| N-2 |                 | M      | 32  | -                       | -   |
| N-3 |                 | F      | 27  | -                       | -   |
| N-4 |                 | F      | 37  | -                       | -   |

S—Ebola survivors, N—Non-infected control. M-male, F-female.

**Table S2.** Survivor's hospitalization profiles.

| No. | Hospital Admission | Hospitalization Duration (Days) | Treatment During Hospitalization <sup>†</sup> | Treatment After Release | Post Infection Symptoms <sup>&amp;</sup> |
|-----|--------------------|---------------------------------|-----------------------------------------------|-------------------------|------------------------------------------|
| S-1 | Kagadi             | 10                              | -                                             | -                       | +                                        |
| S-2 | Kagadi             | 30                              | -                                             | -                       | +                                        |
| S-3 | <i>Kibaale</i>     | -                               | -                                             | -                       | +                                        |
| S-4 | -                  | -                               | -                                             | -                       | +                                        |
| S-5 | -                  | -                               | -                                             | -                       | +                                        |
| S-1 | Gulu               | 14                              | -                                             | -                       | +                                        |
| S-2 | Lacor              | 30                              | -                                             | -                       | +                                        |
| S-3 | Lacor              | 30                              | -                                             | -                       | +                                        |
| S-4 | <i>Gulu</i>        | 14                              | -                                             | -                       | +                                        |
| S-5 | Gulu               | 14                              | -                                             | -                       | +                                        |
| S-6 | Lacor              | 10                              | -                                             | -                       | +                                        |

<sup>†</sup> All survivors received standard supportive care, including nutrition, electrolytes and liquids. No specific treatment against EHF was provided. <sup>&</sup> All survivors reported some post-infection symptoms associated with EHF recovery. Symptoms included impaired vision, muscle and joint pain, weakness and appetite loss. S—Ebola survivors. “-” Negative treatment or hospitalization, “+”—Positive treatment.

© 2015 by the authors; licensee MDPI, Basel, Switzerland. This article is an open access article distributed under the terms and conditions of the Creative Commons Attribution license (<http://creativecommons.org/licenses/by/4.0/>).
